# Supplementary material for: Enhanced healing process of tooth sockets using strontium-doped TiO2
Source: Royal Society of Chemistry journal article supplement (doi:10.1039/d2ra00341d), 2022-01-01
Supplement: d2ra00341d1.pdf [file d2ra00341d1.pdf]

## **Enhanced healing process of tooth sockets using strontium-doped TiO<sub>2</sub>**

Jialing Li,<sup>a, b</sup> Min Huang,<sup>b</sup> Yonglin Xie,<sup>b</sup> Zilu Fan,<sup>b</sup> Guanzhen Ju,<sup>b</sup> Jianping Ruan<sup>\*a</sup>

*<sup>a</sup> Coll Stomatol, Dept Prevent Dent, Xi'an Jiao Tong University, Xi'an, Shaanxi  
Province, China*

*<sup>b</sup> Nanchong Central Hospital, the Second Clinical College of North Sichuan Medical  
College, Nanchong, Sichuan, China*

## **Experimental section**

### **Materials**

Potassium chloride (KCl, 98%), Strontium nitrate ( $\text{Sr}(\text{NO}_3)_2$ , 95%), titanium (IV) isopropoxide (TTIP, AG), hexadecylamine (AG), Dimethylformamide (DMF, AG), and ethanol (AG) were obtained from Sigma-Aldrich (St. Louis, MO, USA). 4,4-methylene diphenyl diisocyanate (MDI, 98%), poly(tetramethyleneoxide) (PTMO, Mn = 1000), anhydrous toluene (99.8%), and 1,4-butylene glycol (AG) were purchased from Acros Organics Co.

### **Fabrication of Sr-TiO<sub>2</sub> mesoporous nanospheres**

The Sr-TiO<sub>2</sub> mesoporous nanospheres were synthesized by a sol-gel strategy and a followed solvothermal process. 0.9 g of KCl was dissolved in 2 mL of deionised water, which was then slowly added to 25 mL of 1 wt% hexadecylamine in ethanol. After addition of 0.1 mmol of  $\text{Sr}(\text{NO}_3)_2$ , 2 mL of TTIP was poured into the above solution with continuously stirring for 6 h. The resulted suspension was transferred into the Teflon-lined autoclaves and heated at 180 °C for 12 h. After reaction, the Sr-TiO<sub>2</sub> products were collected, washed, dried, and calcined at 450 °C for 4 h in air. The undoped TiO<sub>2</sub> was prepared using a similar process without the addition of the Sr dopants.

### **Preparation of NH<sub>2</sub>-functionalized Sr-TiO<sub>2</sub> (Sr-TiO<sub>2</sub>/MDI) mesoporous nanospheres**

3.0 g of MDI was dissolved in 50 mL of anhydrous toluene, which was transferred into a two-necked round-bottomed flask. Subsequently, 1.0 g of Sr-TiO<sub>2</sub> was added to the flask under stirring. The temperature was kept at 60 °C for 6 h under N<sub>2</sub> flow. After reaction, the cooled mixture was filtered and washed with anhydrous toluene to remove excess MDI and physically adsorbed species. The obtained Sr-TiO<sub>2</sub>/MDI product was dried at 120 °C in a vacuum oven.

### **Synthesis of injectable SPU/Sr-TiO<sub>2</sub>/MDI adhesives**

Before experiment, the OCN-terminated polymer was firstly prepared by the reaction between MDI (1.5 g) and PTMO (3.0 g) in 15 mL of DMF at 90 °C for 3 h under N<sub>2</sub>

flow. As a chain extender, 0.5 mL of 1,4-butylene glycol was then slowly poured into the above mixture under stirring for further 10 minutes. Next, 1.0 g of Sr-TiO<sub>2</sub>/MDI was added to the pale yellow viscose solution and stirred for another 2 h to attain the injectable SPU/Sr-TiO<sub>2</sub>/MDI adhesives.

### **Characterization**

The morphological information of the Sr-TiO<sub>2</sub> mesoporous nanospheres were studied by transmission electron microscopy (TEM, JEOL JEM 2100 Co., Tokyo, Japan) with an accelerating voltage of 200 keV. The SPU/Sr-TiO<sub>2</sub>/MDI adhesives were characterized by scanning electron microscope (SEM, FEI Quanta 200FEG, Oregon, USA) operated at 10 kV. X-ray photoelectron spectroscopy (XPS) technique was performed using Alpha 110 instrument (East Grinstead, UK) with monochromatic Al K $\alpha$  radiation ( $h\nu = 1486.7$  eV) and a pass energy of 20 eV. Powder X-ray diffraction (XRD) test were carried out on Philips PW 1710 diffractometer with Cu K $\alpha$  ( $\lambda = 1.5406\text{\AA}$ ) radiation. Raman spectra were acquired on a Raman microscope (LabRAM HR, HORIBA Jobin Yvon Inc.), the used excitation wavelength was 532 nm. UV-vis spectra (UV/vis DRS) were recorded using a Shimadzu spectrophotometer (MPC-2200).

### **In vitro antibacterial test**

The antibacterial activity of SPU/Sr-TiO<sub>2</sub>/MDI was estimated with the bacterium strains of E. coli by zone of inhibition method. Firstly, 100  $\mu\text{L}$  of 108CFU/mL bacteria suspension was spread on a LB agar plate. Next, 100  $\mu\text{L}$  of freshly obtained compound was injected into sterile blank disc and placed onto the agar surface. The diameter of zone of inhibition was recorded and analyzed after incubation at 37°C for 24 h.

### **In vitro cell viability**

L02 cells were cultivated in Dulbecco's minimum essential medium containing 10% (v/v) fetal bovine serum, 0.01% ascorbic acid, 10  $\mu\text{g/mL}$  peni-cillin and streptomycin at 37°C in 5% CO<sub>2</sub> and 95% humidity. The culture medium was replaced in every two days. The cells were seeded on a piece of sterile dressing on 96-well plates with 100  $\mu\text{L}$  of the fresh medium. The culture medium was removed from each well after 24 h, followed by the adding of MTT solution (100  $\mu\text{L}$ , 5 mg/mL in fetal bovine serum) and

culturing at 37 °C for another 4 h. Afterward, the 200 µL of dimethyl sulfoxide (DMSO) was introduced to replace the MTT solution. A microplate reader (Tecan i-control multiplate reader, Switzerland) was employed to evaluate the cell viability by measuring the absorbance at 490 nm.

### **Animal experiments**

The in vivo animal experiment was supported by Institute of Radiation Medicine, Chinese Academy of Medical Science (IRM-CAMS) Tianjin, China. The 16 Kunming rats (Male, 10 weeks old with about 200 g body weight) were used for animal studies and randomly divided into two groups (blank SPU and SPU/Sr-TiO<sub>2</sub>/MDI). The right mandibular central incisor was removed under general anesthesia with 0.3 ml/kg SUI-MIAN-XIN. The tooth sockets were injected with the prepared adhesives for each group. The treated rats were then given ampicillin sodium and fed the soft diet for 3 days. In each group, two rats were randomly selected after 1, 2, 4 and 7 weeks' treatment. The selected rats were continuously perfused with 4% paraformaldehyde through MINI-type infusion pump. The mandibles were separated after complete fixation and treated with 4% paraformaldehyde for 24 h.

### **Statistical analysis**

All the triplicate data in this study have been calculated and analyzed using analysis of variance for presenting a significance level at  $p < 0.05$  and standard deviations ( $\pm$ ).

## Figures

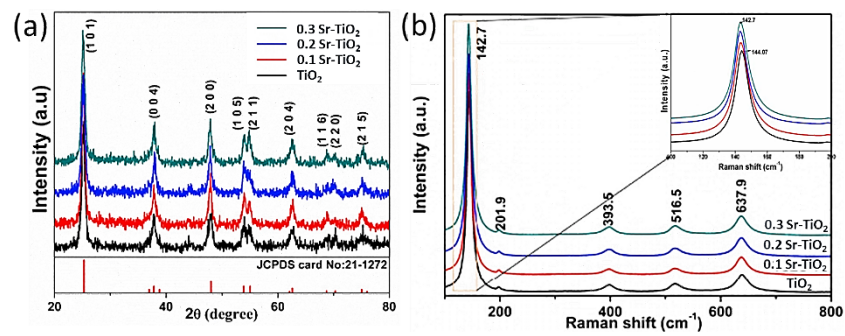

**Figure S1** XRD patterns (a) and Raman spectra (b) for  $\text{TiO}_2$ , 0.1 Sr- $\text{TiO}_2$ , 0.2 Sr- $\text{TiO}_2$ , and 0.3 Sr- $\text{TiO}_2$  products.

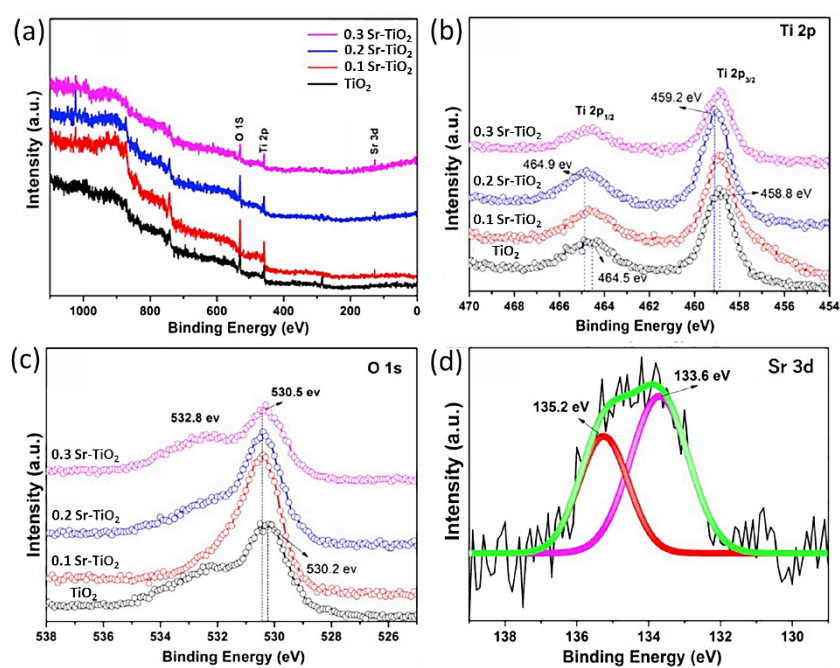

**Figure S2** XPS profiles of  $\text{TiO}_2$  and different  $\text{Sr-TiO}_2$  products. (a) Survey spectrum, (b) Ti 2p, (c) O 1s, and (d) Sr 3d.

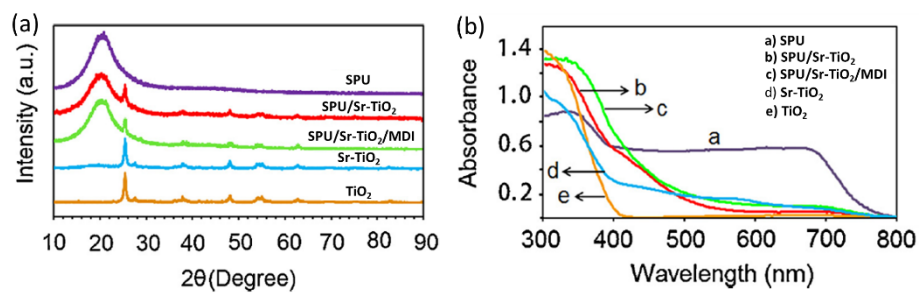

**Figure S3** (a) XRD profiles of TiO<sub>2</sub>, Sr-TiO<sub>2</sub>, SPU/Sr-TiO<sub>2</sub>/MDI, SPU/Sr-TiO<sub>2</sub>, and SPU samples and their UV-vis DR spectra (b).

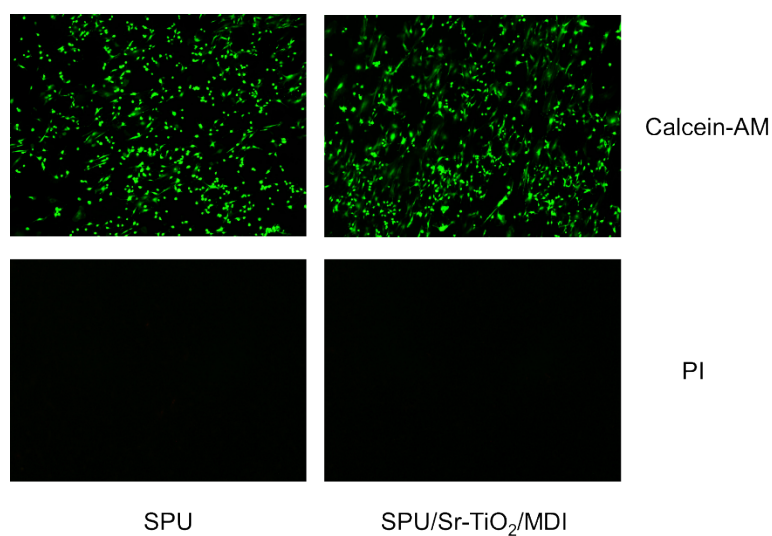

**Figure S4** Staining of living/ dead rBMSCs on the surface of different materials.

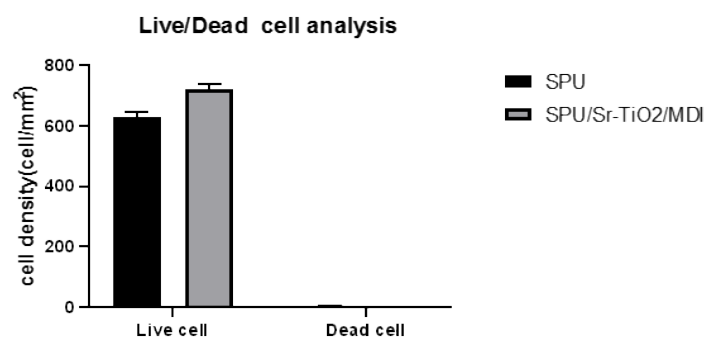

**Figure S5** Cell density for the live and dead cell by applying different materials.

**Table S1.** Comparison of SPU/ Sr-TiO<sub>2</sub>/ MDI with different materials in the field.

| Material                       | Common point                                                                        | Merit                                                                                                                                                                                                                                                                                                       | Drawback                                                                                                                  |
|--------------------------------|-------------------------------------------------------------------------------------|-------------------------------------------------------------------------------------------------------------------------------------------------------------------------------------------------------------------------------------------------------------------------------------------------------------|---------------------------------------------------------------------------------------------------------------------------|
| SPU/ Sr-TiO <sub>2</sub> / MDI | Promote wound healing, ability to fill the defect tissue, and fine biocompatibility | Anti infection, suitable for periodontitis extraction of affected teeth; Injectability, strong plasticity and convenient operation. Suitable for post extraction site preservation of irregular extraction socket; Hard to cause secondary injury of bone repair site; Stable degradation performance.      | The long-term effect needs to be observed.                                                                                |
| Collagen sponge                |                                                                                     | Anti infection, rapid hemostasis, stable blood clot, preventing blood clot from falling off and foreign bodies from falling into the tooth extraction socket, provide a stable environment for blood clot mechanized osteogenesis, suitable for those with multiple bleeding and poor coagulation function. | In the process of absorption, there will be slight inflammatory reaction and low mechanical properties.                   |
| Calcium sulfate hemihydrate    |                                                                                     | Reduce exudation, protect wounds and prevent bleeding; Suitable for patients with oral anticoagulants.                                                                                                                                                                                                      | Excessive absorption rate in vivo; Degradation products are easy to lead to local exudation reaction of incision.         |
| BIOSs bone meal                |                                                                                     | Strong effect on promoting osteogenesis and a large amount of new bone formation, which is conducive to the recovery of patients' wounds and                                                                                                                                                                | Immune inflammatory reaction might happens; Inconvenient to operate, requires a special bone powder conveyor for filling. |

|                                          |  |                                                                                                                                               |                                                                                                                                                      |
|------------------------------------------|--|-----------------------------------------------------------------------------------------------------------------------------------------------|------------------------------------------------------------------------------------------------------------------------------------------------------|
|                                          |  | surrounding tissues;<br>Suitable for patients<br>with many bone defects.                                                                      |                                                                                                                                                      |
| Hydroxyapatite<br>artificial bone powder |  | The effect of promoting<br>osteogenesis is not as<br>good as BIOSs bone<br>powder; Suitable for<br>patients with small-<br>scale bone defects | Low mechanical<br>performance, slow<br>degradation speed and<br>inconvenient operation,<br>Requires a special bone<br>powder conveyor for<br>filling |
| CGF hydroxyapatite<br>ceramics           |  | Shorten the time of<br>bone healing and<br>improve the quality of<br>bone tissue. Suitable for<br>those with poor bone<br>tissue conditions   | High cost and<br>complicated fabrication.                                                                                                            |
